# Supplementary material
Source: HighWire-hosted journal article supplement (https://www.jrheum.org/highwire/filestream/39494/field_highwire_adjunct_files/0/200673DataSuppl.pdf)
Supplement: 200673DataSuppl.pdf [file 200673DataSuppl.pdf]

## ONLINE SUPPLEMENTARY MATERIAL

**Supplementary Table 1.** Baseline characteristics of participants who completed study visits or were lost to follow-up

| Variable                                          | Completed     | Did Not Complete (Lost to Follow-up or Died) | p (Comparing Completed to Did Not Complete) | Lost to Follow-up | Died          | p (Comparing All Three Groups) |
|---------------------------------------------------|---------------|----------------------------------------------|---------------------------------------------|-------------------|---------------|--------------------------------|
| N                                                 | 84            | 29                                           |                                             | 22                | 7             |                                |
| Age (yrs)                                         | 54.5 (12.6)   | 60.0 (11.8)                                  | 0.04                                        | 58.9 (13.1)       | 63.4 (5.8)    | 0.09                           |
| Female, N (%)                                     | 48 (57%)      | 11 (38%)                                     | 0.07                                        | 6 (27%)           | 5 (71%)       | 0.03                           |
| Black or African American, N (%)                  | 27 (32%)      | 11 (38%)                                     | 0.57                                        | 7 (32%)           | 4 (57%)       | .40                            |
| Body Mass Index, (kg/m <sup>2</sup> )             | 29.1 (7.0)    | 27.8 (8.9)                                   | 0.43                                        | 25.8 (6.4)        | 34.1 (12.8)   | 0.03                           |
| Visceral Fat Area (cm <sup>2</sup> )              | 138.9 (75.4)  | 117.8 (66.2)                                 | 0.19                                        | 103.8 (57.8)      | 169.0 (75.0)  | 0.06                           |
| FMI Z                                             | -0.032 (1.09) | -0.57 (1.45)                                 | 0.04                                        | -0.72 (1.56)      | -0.022 (0.76) | 0.05                           |
| FGF-21 (pg/mL)                                    | 190.0 (152.1) | 310.8 (470.7)                                | 0.04                                        | 187.5 (328.3)     | 698.1 (652.7) | <0.001                         |
| M-DAS                                             | 2.19 (1.21)   | 2.75 (1.10)                                  | 0.03                                        | 2.69 (1.20)       | 2.93 (0.76)   | 0.09                           |
| DAS28(CRP)                                        | 3.04 (1.28)   | 3.39 (0.90)                                  | 0.18                                        | 3.32 (0.90)       | 3.58 (0.94)   | 0.36                           |
| vdHS                                              | 33.8 (48.9)   | 52.1 (63.0)                                  | 0.14                                        | 48.9 (68.4)       | 62.2 (45.5)   | 0.30                           |
| Muscle Density Z                                  | -0.78 (1.10)  | -0.79 (1.22)                                 | 0.96                                        | -0.59 (1.11)      | -1.40 (1.41)  | 0.27                           |
| Muscle Area Z                                     | -0.26 (1.34)  | -0.76 (1.30)                                 | 0.10                                        | -0.76 (1.27)      | -0.76 (1.52)  | 0.26                           |
| Peak Isometric Torque, Extension at Knee (ft-lbs) | 61.1 (29.8)   | 54.6 (33.5)                                  | 0.34                                        | 59.9 (35.8)       | 35.4 (11.1)   | 0.14                           |
| Peak Isometric Torque, Flexion at Knee (ft-lbs)   | 30.3 (15.8)   | 25.6 (16.4)                                  | 0.19                                        | 27.2 (17.8)       | 19.8 (8.05)   | 0.25                           |
| Grip Strength (kg)                                | 23.3 (10.2)   | 24.0 (10.3)                                  | 0.74                                        | 25.0 (11.0)       | 20.5 (7.36)   | 0.60                           |
| HAQ                                               | 0.76 (0.66)   | 0.84 (0.56)                                  | 0.58                                        | 0.72 (0.53)       | 1.21 (0.50)   | 0.18                           |

|      |             |             |      |             |             |      |
|------|-------------|-------------|------|-------------|-------------|------|
| SPPB | 10.4 (2.15) | 10.1 (2.19) | 0.55 | 10.1 (2.22) | 10.0 (2.83) | 0.84 |
|------|-------------|-------------|------|-------------|-------------|------|

Legend: Results displayed as Mean(SD) or Median (IQR) for skewed data. Mean and SD of all Z-Scores in controls are 0 +/- 1, by definition. P values represent results of ANOVA, chi-squared, or Kruskal-Wallis tests.

**Supplementary Table 2.** Basic characteristics of study participants at baseline, comparing first three FGF-21 quartiles to the fourth quartile.

|                                           | 1 <sup>st</sup> -3 <sup>rd</sup> Quartiles | 4 <sup>th</sup> Quartile | p      |
|-------------------------------------------|--------------------------------------------|--------------------------|--------|
| N                                         | 85                                         | 28                       |        |
| Age (yrs)                                 | 54.9 (13.4)                                | 59.1 (8.9)               | 0.13   |
| Female, N (%)                             | 41 (48%)                                   | 18 (64%)                 | 0.14   |
| Black or African American, N (%)          | 28 (33%)                                   | 10 (36%)                 | 0.79   |
| Body Mass Index, (kg/m <sup>2</sup> )     | 27.7 (6.5)                                 | 32.1 (9.2)               | 0.006  |
| ALMI Z-Score                              | -0.28 (0.88)                               | -0.10 (1.52)             | 0.45   |
| FMI Z-Score                               | -0.31 (1.17)                               | 0.29 (1.20)              | 0.02   |
| Visceral Fat Area (cm <sup>2</sup> )      | 118.57 (60.4)                              | 180.3 (90.6)             | 0.0001 |
| Diabetes, N (%)                           | 10 (12%)                                   | 3 (11%)                  | 0.88   |
| Cardiac Disease, N (%)                    | 37 (44%)                                   | 22 (79%)                 | 0.001  |
| <i>Prior MI, N (%)</i>                    | 5 (6%)                                     | 3 (12%)                  | 0.36   |
| <i>Prior CABG, N (%)</i>                  | 1 (1%)                                     | 1 (4%)                   | 0.41   |
| <i>Prior DVT, N (%)</i>                   | 4 (5%)                                     | 2 (7%)                   | 0.62   |
| <i>Hypertension, N (%)</i>                | 34 (40%)                                   | 22 (79%)                 | <0.001 |
| <i>Peripheral Vascular Disease, N (%)</i> | 2 (3%)                                     | 1 (4%)                   | 0.72   |
| <i>Prior Stroke, N (%)</i>                | 3 (4%)                                     | 2 (7%)                   | 0.42   |
| <i>Prior TIA, N (%)</i>                   | 2 (2%)                                     | 2 (7%)                   | 0.23   |
| EGFR (mL/min/1.73m <sup>2</sup> )         | 98.8 (24.0)                                | 88.9 (28.7)              | 0.08   |
| Current Smoker, N (%)                     | 18 (21%)                                   | 8 (29%)                  | 0.42   |
|                                           |                                            |                          |        |
| <b><u>RA Disease Characteristics</u></b>  |                                            |                          |        |
| M-DAS (CRP)                               | 2.25 (1.22)                                | 2.60 (1.13)              | 0.18   |
| DAS28 (CRP)                               | 3.01 (1.22)                                | 3.48 (1.07)              | 0.07   |
| HAQ Score                                 | 0.67 (0.60)                                | 1.12 (0.62)              | 0.001  |
| SPPB                                      | 12 (10,12)                                 | 9 (8,11)                 | 0.003  |
| vdHS Score                                | 13 (3, 53)                                 | 16.5 (6, 73)             | 0.51   |
| Disease Duration, yrs                     | 8.6 (2.7, 17.0)                            | 5.2 (0.9, 26.0)          | 0.80   |
| Current Methotrexate, N (%)               | 59 (69%)                                   | 16 (57%)                 | 0.23   |
| Current Biologic Therapy, N (%)           | 42 (49%)                                   | 16 (57%)                 | 0.48   |
| Current Prednisone, N (%)                 | 35 (41%)                                   | 16 (57%)                 | 0.14   |

Abbreviations: ALMI= Appendicular Lean Mass Index; FMI= Fat Mass Index; RA= Rheumatoid Arthritis; DAS28(CRP)= Disease Activity Score of 28 joints including C-Reactive Protein; M-DAS= modified disease activity score; HAQ= Health Assessment Questionnaire; SPPB= Short Physical Performance Battery; vdHS= van der Heide-Sharp.

Legend: Results displayed as Mean(SD) or Median (IQR) for skewed data. Mean and SD of all Z-Scores in controls are 0 +/- 1, by definition. P values represent results of ANOVA, chi-squared, or Kruskal-Wallis tests.

**Supplementary Table 3.** Associations between standardized serum biomarker levels and FGF-21 at baseline.

| Marker   | Univariate        |        |     | Adjusted for Visceral Fat |        |     | Adjusted for Visceral Fat, Age, Gender, Methotrexate Use, and Smoking |        |     |
|----------|-------------------|--------|-----|---------------------------|--------|-----|-----------------------------------------------------------------------|--------|-----|
|          | $\beta$ (95% CI)  | p      | N   | $\beta$ (95% CI)          | p      | N   | $\beta$ (95% CI)                                                      | p      | N   |
| TNF-RI   | 0.43 (0.26, 0.60) | <0.001 | 106 | 0.33 (0.17, 0.50)         | <0.001 | 104 | 0.35 (0.17, 0.53)                                                     | <0.001 | 104 |
| YKL-40   | 0.30 (0.12, 0.48) | 0.001  | 106 | 0.28 (0.12, 0.45)         | 0.001  | 104 | 0.26 (0.08, 0.43)                                                     | 0.005  | 104 |
| VEGF     | 0.28 (0.10, 0.46) | 0.003  | 106 | 0.20 (0.03, 0.38)         | 0.02   | 104 | 0.17 (0.003, 0.34)                                                    | 0.046  | 104 |
| Resistin | 0.25 (0.07, 0.43) | 0.008  | 106 | 0.20 (0.03, 0.36)         | 0.02   | 104 | 0.17 (0.004, 0.34)                                                    | 0.045  | 104 |

Legend:  $\beta$  coefficients represent differences in standardized FGF-21 levels associated with a 1 SD higher level of each biomarker at baseline.

**Supplementary Table 4.** Sensitivity analysis evaluating associations between FGF-21 levels and worsening of outcome measures, excluding patients who died before follow-up.

|                                                                 | <b>Worsening Before Follow-Up</b> |          |          |
|-----------------------------------------------------------------|-----------------------------------|----------|----------|
|                                                                 | <u>OR (95% CI)</u>                | <u>p</u> | <u>N</u> |
| <b><u>Muscle Density Z-Score</u></b>                            |                                   |          |          |
| FGF-21                                                          | 1.32 (0.57, 3.06)                 | 0.52     | 76       |
| <b><u>Muscle Area Z-Score</u></b>                               |                                   |          |          |
| FGF-21                                                          | 2.10 (0.75, 5.90)                 | 0.16     | 70       |
| <b><u>Peak Isometric Torque, Extension at Knee (ft-lbs)</u></b> |                                   |          |          |
| FGF-21                                                          | 1.32 (0.68, 2.56)                 | 0.42     | 72       |
| <b><u>Peak Isometric Torque, Flexion at Knee (ft-lbs)</u></b>   |                                   |          |          |
| FGF-21                                                          | 1.35 (0.68, 2.71)                 | 0.39     | 72       |
| <b><u>Grip Strength (kg)</u></b>                                |                                   |          |          |
| FGF-21                                                          | 1.13 (0.46, 2.80)                 | 0.79     | 81       |
| <b><u>HAQ</u></b>                                               |                                   |          |          |
| FGF-21                                                          | 2.93 (1.29, 6.63)                 | 0.01     | 83       |
| <b><u>SPPB</u></b>                                              |                                   |          |          |
| FGF-21                                                          | 1.22 (0.37, 4.06)                 | 0.75     | 49       |

Legend: Models include adjustments for age, gender, visceral fat area, current smoking, and methotrexate use (all at baseline). Clinically meaningful worsening was defined as follows: HAQ increase of 0.2; SPPB decrease of 1; extension and flexion strength decrease of 10%; grip strength decrease of 6.5 kg; muscle density and muscle area z-score decrease of 0.5
